# Supplementary material for: An application of PCR-RFLP species identification assay for environmental DNA detection
Source: PeerJ. 2019 Oct 3;7:e7597. doi: 10.7717/peerj.7597 (PMC6778664; doi:10.7717/peerj.7597)
Supplement: Supplemental Information 2 — n/a qPCR not conducted; Rj, R. japonica; Ro, R. ornativentris; Rtt, R. t. tagoi. [file peerj-07-7597-s002.xlsx]

## Sheet: Sheet1
Supplementary Table 1.
Field	Site #	Date	Time	Latitude	Longitude	Field observation	Details	qPCR (R.t. tagoi only)	PCR-RFLP results
A	1	2015-05-12	13:40:00	37.5067	140.911	-	Bufo japonicus formosus tadpoles.	-	-
A	2	2015-05-12	14:41:00	37.5391	140.867	+	Rtt tadpoles	-	-
A	3	2015-05-12	11:41:00	37.5036	140.914	+	Rtt adults	+	-
A	4	2015-05-12	12:00:00	37.5036	140.914	+	Rtt adults	+	-
A	5	2015-05-13	13:55:00	37.5746	140.881	-		-	-
A	6	2015-05-13	14:44:00	37.5627	140.876	+	Rtt adults	-	-
A	7	2015-05-14	16:11:00	37.627	140.878	-		+	Rtt
A	8	2015-05-14	09:58:00	37.7243	140.791	+	Rtt and Ro adults	-	-
A	9	2015-05-14	11:48:00	37.7221	140.816	+	Rtt adults	-	-
A	10	2015-05-14	14:25:00	37.7558	140.741	+	Rtt and Ro adults	+	-
A	11	2015-08-11	11:33:00	37.5534	140.835	-		-	-
A	12	2015-08-13	12:38:00	37.5376	140.866	+	Rtt adults	-	-
A	13	2015-08-13	11:16:00	37.513	140.887	+	Rtt and Ro adults	-	-
A	14	2015-08-11	15:41:00	37.7558	140.741	+	Rtt adults	+	-
A	15	2015-08-11	10:24:00	37.7221	140.816	-		-	-
A	16	2015-08-12	12:06:00	37.7243	140.791	+	Rtt adults	-	-
A	17	2015-08-12	14:10:00	37.8032	140.757	+	Rtt adults	-	-
A	18	2015-08-12	15:30:00	37.8324	140.699	+	Rtt adults	-	-
A	19	2015-08-13	10:15:00	37.5638	140.773	+	Rtt and Ro adults	+	-
A	20	2015-08-13	14:18:00	37.7419	140.726	+	Rtt and Ro adults	-	-
B	21	2016-04-11		34.3992	132.713	+	Rj tadpoles	n/a	Rj
B	22	2016-04-11		34.3992	132.713	+	Rj tadpoles	n/a	Rj
B	23	2016-04-11		34.4031	132.717	-		n/a	-
B	24	2016-04-11		34.4031	132.717	-		n/a	-
B	25	2016-04-11		34.4035	132.719	-		n/a	-
B	26	2016-04-11		34.4035	132.719	-		n/a	-
C	27	2016-04-17		34.2707	132.477	+	Rj tadpoles	n/a	Rj
C	28	2016-04-17		34.2707	132.477	-		n/a	Rj
n/a qPCR not conducted; Rj = R. japonica; Ro = R. ornativentris; Rtt = R. t. tagoi
